# Supplementary material
Source: PubMed Central journal article supplement (PMC2926211)
Supplement: NIHMS218187-supplement-03.pdf [file NIHMS218187-supplement-03.pdf]

**Supplementary Fig. 1.** Ultrastructural alteration of astrocytes in the pre-optic chiasm of *Nf1*<sup>+/-GFAP</sup>CKO mice. (A, C, E) *Nf1*<sup>GFAP</sup>CKO 9 month-old control mice and (B, D, F-H) *Nf1*<sup>+/-GFAP</sup>CKO 9 month-old mice. Note that *Nf1*<sup>+/-GFAP</sup>CKO 9 month-old mice showed optic glioma, aggregated astroglial cells, hypercellularity and optic nerve fiber irregularities in the pre-optic chiasm (B, b). High magnification micrographs showed that *Nf1*<sup>+/-GFAP</sup>CKO 9 month-old mice have irregular nuclear morphology and an elongated cytoplasm that contained many organelles and glial filaments (D, F-H). Scale bars = (A-a, B-b) 50  $\mu$ m; (A, B) 10  $\mu$ m; (C, D) 2  $\mu$ m; (E, F) 1  $\mu$ m; (G, H) 3  $\mu$ m.

**Supplementary Fig. 2.** Brn3a-positive RGC loss in *Nf1*<sup>+/-GFAP</sup>CKO mice.

Representative retinal flatmounts and sections from 9-month-old wild-type (A, E, I, M), *Nf1*<sup>+/-</sup> (B, F, J, N), *Nf1*<sup>GFAP</sup>CKO (C, G, K, O) and *Nf1*<sup>+/-GFAP</sup>CKO (D, H, L, P) mice. Compared to wild-type, *Nf1*<sup>+/-</sup>, and *Nf1*<sup>GFAP</sup>CKO mice, *Nf1*<sup>+/-GFAP</sup>CKO mouse retina showed a significant decrease in the numbers of RGC neurons. Scale bar = 20 $\mu$ m.
